# Supplementary material for: Associations between continuous glucose monitoring-derived metrics and diabetic retinopathy and albuminuria in patients with type 2 diabetes
Source: PubMed Central journal article supplement — BMJ Open Diabetes Res Care. 2021 Apr 20;9(1):e001923. doi: 10.1136/bmjdrc-2020-001923 (PMC8061826; doi:10.1136/bmjdrc-2020-001923), 2021-04-20
Supplement: bmjdrc-2020-001923supp001.pdf [file bmjdrc-2020-001923supp001.pdf]

Supplementary Table 1. List of sites and investigators.

| Site                                                                                                 | Investigator                                                                                                                                                                                               |
|------------------------------------------------------------------------------------------------------|------------------------------------------------------------------------------------------------------------------------------------------------------------------------------------------------------------|
| Ashiya Central Hospital                                                                              | Koji Matsushita, Manabu Narisawa                                                                                                                                                                           |
| Aso Clinic                                                                                           | Katsumi Aso, Yuko Ando, Fumihiko Sato                                                                                                                                                                      |
| Hagiwara Central Hospital                                                                            | Emiko Morita, Keiichi Torimoto                                                                                                                                                                             |
| Hayashi Clinic                                                                                       | Isao Hayashi                                                                                                                                                                                               |
| Inokuchi Clinic                                                                                      | Nobuo Inokuchi                                                                                                                                                                                             |
| Japan Community Health Care Organization Osaka Hospital                                              | Masahiro Hatazaki, Arichika Deguchi, Azusa Shiraki                                                                                                                                                         |
| Juntendo Tokyo Koto Geriatric Medical Center (Department of Medicine, Diabetology and Endocrinology) | Ayako Kitamura, Eri Tanabe, Hidenori Yoshii, Tomio Onuma, Tomo Nakajima, Yasuhiko Furukawa                                                                                                                 |
| Juntendo University Graduate School of Medicine (Department of Metabolism & Endocrinology)           | Eisuke Yasunari, Hideyoshi Kaga, Hiroaki Sato, Hiroataka Watada, Kagami Takeno, Luka Suzuki, Miwa Himuro, Syuhei Aoyama, Takashi Funayama, Takehiro Katahira, Takeshi Miyatsuka, Tomoya Mita, Yuya Nishida |
| Juntendo University Nerima Hospital (Department of Medicine, Diabetes and Endocrinology)             | Koji Komiya                                                                                                                                                                                                |
| Kanda Naika Clinic                                                                                   | Satoshi Kawashima                                                                                                                                                                                          |
| Kansai Rosai Hospital (Diabetes and Endocrinology)                                                   | Tsunehiko Yamamoto                                                                                                                                                                                         |
| Kihara Diabetes Clinic                                                                               | Yasuyuki Kihara                                                                                                                                                                                            |
| Kosugi Medical Clinic                                                                                | Keisuke Kosugi                                                                                                                                                                                             |
| Kawasaki Hospital (Department of Internal Medicine)                                                  | Akihito Otsuka, Jun Murai                                                                                                                                                                                  |
| Matsuoka Medical Clinic                                                                              | Hirofumi Matsuoka                                                                                                                                                                                          |
| Misaki Naika Clinic                                                                                  | Nobuichi Kuribayashi                                                                                                                                                                                       |
| Japan Labour Health and Safety                                                                       | Tadashi Arao, Kei Sugai                                                                                                                                                                                    |

|                                                                                                                        |                                                                                                                                                                                                  |
|------------------------------------------------------------------------------------------------------------------------|--------------------------------------------------------------------------------------------------------------------------------------------------------------------------------------------------|
| Organization Kyushu Rosai Hospital, Moji Medical Center (Department of Internal Medicine)                              |                                                                                                                                                                                                  |
| Musashino Family Clinic                                                                                                | Yuichi Kojima                                                                                                                                                                                    |
| Nakakinen Clinic                                                                                                       | Maiko Nakata, Miyoko Saito, Takeshi Osonoi, Yusuke Osonoi                                                                                                                                        |
| Nakama Municipal hospital                                                                                              | Kohei Uriu, Yoshifumi Inada, Kanako Suzuka, Ichiro Takagi                                                                                                                                        |
| National Hospital Organization Osaka National Hospital (Diabetes Center)                                               | Ken Kato                                                                                                                                                                                         |
| Nishida Keiko Diabetes Clinic                                                                                          | Keiko Nishida, Akira Kurozumi, Fumi Uemura, Keiichi Torimoto, Maiko Hajime, Manabu Narisawa, Satomi Sonoda, Kumiko Tidiwa                                                                        |
| Osaka General Medical Center (Department of Diabetes and Endocrinology)                                                | Yohei Fujita, Sayoko Shimizu, Masahisa Hata, Yutaka Umayahara                                                                                                                                    |
| Osaka Police Hospital (Department of Endocrinology and Metabolism)                                                     | Tetsuyuki Yasuda                                                                                                                                                                                 |
| Osaka Rosai Hospital                                                                                                   | Kayoko Ryomoto                                                                                                                                                                                   |
| Osaka University Graduate School of Medicine (Department of Metabolic Medicine)                                        | Ichiro Shimomura, Naoto Katakami, Takaaki Matsuoka, Mitsuyoshi Takahara, Kazuyuki Miyashita, Hiroyo Ninomiya, Naohiro Taya                                                                       |
| Sasaki Hospital                                                                                                        | Shinichiro Mine, Kenji Koikawa                                                                                                                                                                   |
| School of Medicine, University of Occupational and Environmental Health, Japan (First Department of Internal Medicine) | Yosuke Okada, Akira Kurozumi, Manabu Narisawa, Maiko Hajime, Fumi Uemura, Satomi Sonoda, Kenichi Tanaka, Takashi Otsuka, Kenji Koikawa, Megumi Miyazaki, Akemi Tokutsu, Momoko Habu, Momo Saito, |
| Secomedic Hospital                                                                                                     | Satomi Wakasugi, Tomoya Mita                                                                                                                                                                     |
| Shiraiwa Medical Clinic                                                                                                | Toshihiko Shiraiwa                                                                                                                                                                               |
| Taneda Clinic                                                                                                          | Yoshinobu Taneda                                                                                                                                                                                 |
| Takaishi Naika Ichoka Clinic                                                                                           | Tomoya Mita                                                                                                                                                                                      |
| Tobata General Hospital                                                                                                | Kazuko Kanda                                                                                                                                                                                     |

(Department of Internal Medicine)

Wakamatsu Hospital of the

University of Occupational and

Environmental Health

Keiichi Torimoto, Kosuke Nishio

---

Sites and investigators are listed in alphabetical order.
